# Supplementary material for: Mint3/Apba3 depletion ameliorates severe murine influenza pneumonia and macrophage cytokine production in response to the influenza virus
Source: PubMed Central journal article supplement (PMC5121658; doi:10.1038/srep37815), 2016-11-24
Supplement: srep37815-s1.pdf [file srep37815-s1.pdf]

## **Supplementary Information**

### **Mint3/Apba3 depletion ameliorates severe murine influenza pneumonia and macrophage cytokine production in response to the influenza virus**

**Takayuki Uematsu<sup>1</sup>, Tomoko Fujita<sup>1,2</sup>, Hiroki J. Nakaoka<sup>3</sup>, Toshiro Hara<sup>4</sup>, Noritada Kobayashi<sup>1</sup>, Yoshinori Murakami<sup>3</sup>, Motoharu Seiki<sup>5</sup> & Takeharu Sakamoto<sup>3\*</sup>**

<sup>1</sup>Biomedical Laboratory, Department of Biomedical Research, Kitasato University Medical Center, Arai, Kitamoto, Saitama, Japan

<sup>2</sup>Innovation Laboratory, NEC Solution Innovators, Ltd., kashiwanoha, Kashiwa, Chiba, Japan

<sup>3</sup>Division of Molecular Pathology, Institute of Medical Science, The University of Tokyo, Shirokanedai, Minato-ku, Tokyo, Japan.

<sup>4</sup>Division of Cancer Cell Research, Institute of Medical Science, The University of Tokyo, Shirokanedai, Minato-ku, Tokyo, Japan.

<sup>5</sup>Faculty of Medicine, Institute of Medical, Pharmaceutical and Health Sciences, Kanazawa University, Takara-machi, Kanazawa, Ishikawa, Japan.

\*Correspondence and requests for materials should be addressed to T.S. (email: t-saka@ims.u-tokyo.ac.jp).

**a**

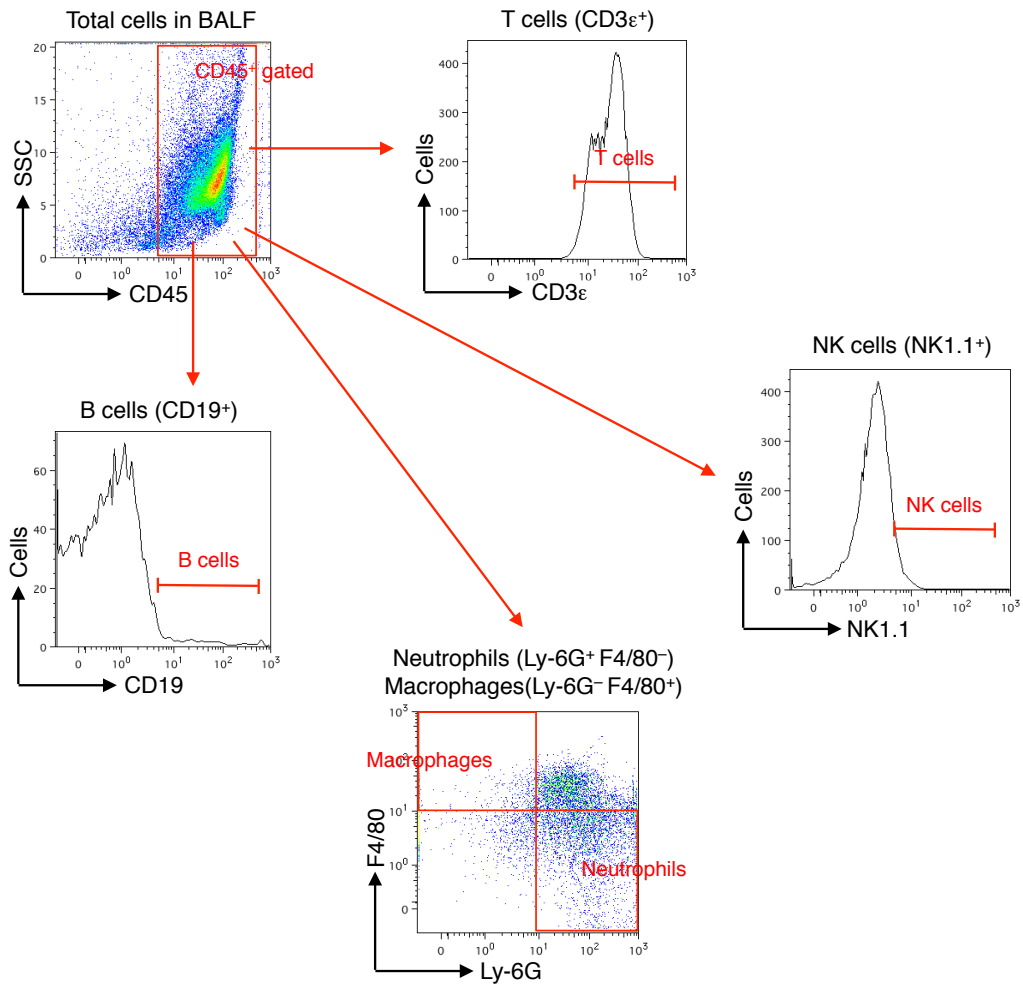

**b**

$$\text{Cell number (/mL)} = \frac{\text{Total cell number in BALF (/mL)}}{\text{CD45 positive \%}} \times \text{CD45 positive \%} \times \begin{matrix} \text{CD3}\epsilon \text{ positive \% (T cells)} \\ \text{CD19 positive \% (B cells)} \\ \text{NK1.1 positive \% (NK cells)} \\ \text{Ly-6G}^+ \text{ F4/80}^- \text{ positive \% (Neutrophils)} \\ \text{Ly-6G}^- \text{ F4/80}^+ \text{ positive \% (Macrophages)} \end{matrix}$$

**C**

**【Total cells in BALF】**

| Days after infection | Mice                 | Total cell number in BALF ( $\times 10^5/\text{mL}$ ) |         |         |         |         |         |
|----------------------|----------------------|-------------------------------------------------------|---------|---------|---------|---------|---------|
|                      |                      | Animal number                                         |         |         |         |         |         |
|                      |                      | 1                                                     | 2       | 3       | 4       | 5       | 6       |
| day0                 | WT                   | 1.6700                                                | 0.8670  | 0.2670  | 0.9000  | 0.7670  | 0.8000  |
|                      | Mint3 <sup>-/-</sup> | 0.8000                                                | 1.6700  | 0.6330  | 0.9670  | 0.8330  | 1.2700  |
| day4                 | WT                   | 19.5000                                               | 15.7000 | 21.4000 | 20.8000 | 17.5000 | 23.4000 |
|                      | Mint3 <sup>-/-</sup> | 13.9000                                               | 9.7700  | 14.5000 | 11.6000 | 12.9000 | 13.5000 |
| day8                 | WT                   | 45.9000                                               | 44.8000 | 35.7000 | 30.4000 | 42.9000 | 38.7000 |
|                      | Mint3 <sup>-/-</sup> | 17.1000                                               | 18.7000 | 22.4000 | 21.9000 | 21.7000 | 19.1000 |

**【T cells】**

| Days after infection | Mice                 | T cell number ( $\times 10^4/\text{mL}$ ) |        |        |        |        |        |
|----------------------|----------------------|-------------------------------------------|--------|--------|--------|--------|--------|
|                      |                      | Animal number                             |        |        |        |        |        |
|                      |                      | 1                                         | 2      | 3      | 4      | 5      | 6      |
| day0                 | WT                   | 0.0000                                    | 0.0014 | 0.0017 | 0.0018 | 0.0017 | 0.0009 |
|                      | Mint3 <sup>-/-</sup> | 0.0020                                    | 0.0020 | 0.0021 | 0.0018 | 0.0023 | 0.0017 |
| day4                 | WT                   | 0.5100                                    | 0.5100 | 0.0460 | 0.5000 | 0.6100 | 0.7100 |
|                      | Mint3 <sup>-/-</sup> | 0.5700                                    | 0.5200 | 0.4800 | 0.5100 | 0.5200 | 0.5500 |
| day8                 | WT                   | 1.8400                                    | 1.8800 | 1.8900 | 1.9100 | 2.2300 | 2.1400 |
|                      | Mint3 <sup>-/-</sup> | 1.7300                                    | 1.7600 | 1.9100 | 1.8400 | 1.8100 | 2.0200 |

**【B cells】**

| Days after infection | Mice                 | B cell number ( $\times 10^4/\text{mL}$ ) |        |        |        |        |        |
|----------------------|----------------------|-------------------------------------------|--------|--------|--------|--------|--------|
|                      |                      | Animal number                             |        |        |        |        |        |
|                      |                      | 1                                         | 2      | 3      | 4      | 5      | 6      |
| day0                 | WT                   | 0.0052                                    | 0.0028 | 0.0033 | 0.0031 | 0.0026 | 0.0016 |
|                      | Mint3 <sup>-/-</sup> | 0.0043                                    | 0.0046 | 0.0050 | 0.0043 | 0.0045 | 0.0031 |
| day4                 | WT                   | 0.0133                                    | 0.0119 | 0.0078 | 0.0136 | 0.0116 | 0.0319 |
|                      | Mint3 <sup>-/-</sup> | 0.0113                                    | 0.0339 | 0.0212 | 0.0177 | 0.0276 | 0.0358 |
| day8                 | WT                   | 0.1470                                    | 0.1440 | 0.0890 | 0.1500 | 0.1470 | 0.0680 |
|                      | Mint3 <sup>-/-</sup> | 0.1303                                    | 0.1317 | 0.0619 | 0.0633 | 0.0468 | 0.1625 |

**【NK cells】**

| Days after infection | Mice                 | NK cell number ( $\times 10^4/\text{mL}$ ) |        |        |        |        |        |
|----------------------|----------------------|--------------------------------------------|--------|--------|--------|--------|--------|
|                      |                      | Animal number                              |        |        |        |        |        |
|                      |                      | 1                                          | 2      | 3      | 4      | 5      | 6      |
| day0                 | WT                   | 0.0019                                     | 0.0047 | 0.0055 | 0.0064 | 0.0046 | 0.0015 |
|                      | Mint3 <sup>-/-</sup> | 0.0057                                     | 0.0057 | 0.0067 | 0.0062 | 0.0061 | 0.0021 |
| day4                 | WT                   | 0.2231                                     | 0.2340 | 0.2231 | 0.2234 | 0.2259 | 0.2897 |
|                      | Mint3 <sup>-/-</sup> | 0.2779                                     | 0.2566 | 0.2480 | 0.2432 | 0.2564 | 0.1987 |
| day8                 | WT                   | 0.1974                                     | 0.2030 | 0.1745 | 0.1891 | 0.1910 | 0.2368 |
|                      | Mint3 <sup>-/-</sup> | 0.2339                                     | 0.2230 | 0.2392 | 0.2234 | 0.2298 | 0.1854 |

**【Neutrophils】**

| Days after infection | Mice                 | Neutrophil number ( $\times 10^4/\text{mL}$ ) |         |         |         |         |         |
|----------------------|----------------------|-----------------------------------------------|---------|---------|---------|---------|---------|
|                      |                      | Animal number                                 |         |         |         |         |         |
|                      |                      | 1                                             | 2       | 3       | 4       | 5       | 6       |
| day0                 | WT                   | 0.0006                                        | 0.0010  | 0.0011  | 0.0012  | 0.0010  | 0.0025  |
|                      | Mint3 <sup>-/-</sup> | 0.0018                                        | 0.0018  | 0.0018  | 0.0016  | 0.0017  | 0.0005  |
| day4                 | WT                   | 17.0100                                       | 16.2020 | 23.6230 | 15.8820 | 15.6792 | 19.2365 |
|                      | Mint3 <sup>-/-</sup> | 14.3710                                       | 11.6730 | 10.8160 | 7.1550  | 13.5037 | 9.8198  |
| day8                 | WT                   | 22.5640                                       | 32.7900 | 19.6960 | 22.6740 | 24.4310 | 27.8925 |
|                      | Mint3 <sup>-/-</sup> | 15.6650                                       | 12.7480 | 14.4450 | 17.7230 | 17.6452 | 13.2624 |

**【Macrophages】**

| Days after infection | Mice                 | Macrophage number ( $\times 10^4/\text{mL}$ ) |        |        |        |        |        |
|----------------------|----------------------|-----------------------------------------------|--------|--------|--------|--------|--------|
|                      |                      | Animal number                                 |        |        |        |        |        |
|                      |                      | 1                                             | 2      | 3      | 4      | 5      | 6      |
| day0                 | WT                   | 0.0015                                        | 0.0024 | 0.0029 | 0.0027 | 0.0020 | 0.0011 |
|                      | Mint3 <sup>-/-</sup> | 0.0023                                        | 0.0025 | 0.0012 | 0.0026 | 0.0019 | 0.0321 |
| day4                 | WT                   | 0.7290                                        | 0.7219 | 0.7690 | 0.7693 | 0.7473 | 0.5287 |
|                      | Mint3 <sup>-/-</sup> | 0.7769                                        | 0.6440 | 0.8652 | 0.5363 | 0.8306 | 0.7258 |
| day8                 | WT                   | 0.8806                                        | 0.6577 | 0.4908 | 0.5874 | 0.6791 | 0.6514 |
|                      | Mint3 <sup>-/-</sup> | 0.7370                                        | 0.4643 | 0.7190 | 0.5260 | 0.4365 | 0.6523 |

**Supplementary Figure S1**

**FACS analytical methods in main Figure 1c.**

(a) FACS gating strategies of total cells in BALF. The plot data are representative ones. (b) Calculation methods of the absolute cell numbers of T cells, B cells, NK cells, neutrophils, and macrophages. (c) The raw data of the absolute cell numbers of T cells, B cells, NK cells, neutrophils, and macrophages in main Figure 1c.

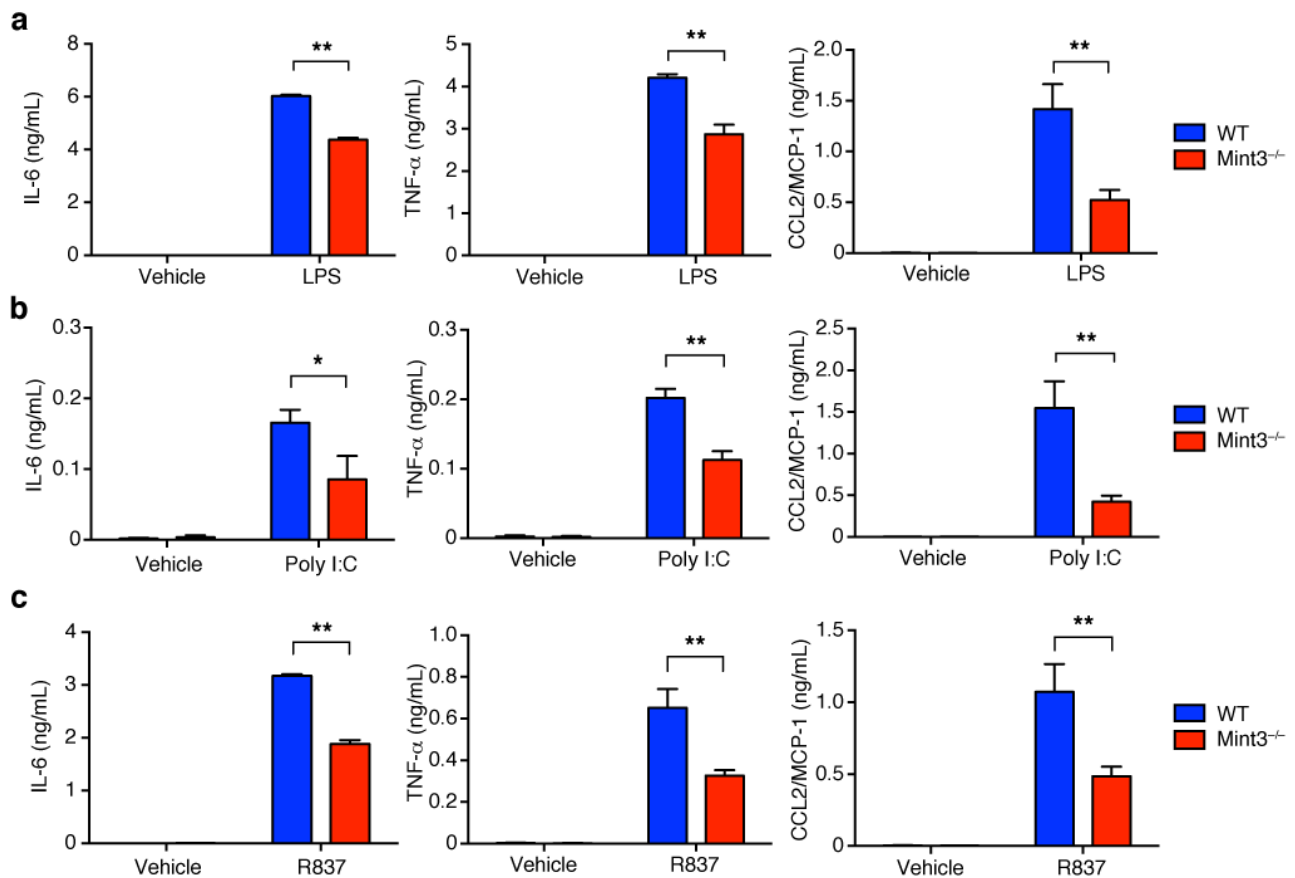

### Supplementary Figure S2

#### Mint3-mediated signaling controls inflammatory cytokine production in response to PAMPs by BMMFs.

BMMFs prepared from WT or Mint3<sup>-/-</sup> mice were stimulated *in vitro* with (a) LPS (100ng/mL), (b) poly I:C (10 $\mu$ g/mL), or (c) imiquimod (R837, 5 $\mu$ g/mL) for 24 h. IL-6, TNF- $\alpha$  and CCL2/MCP-1 production in the cell culture supernatants were measured by ELISA. Data are presented as mean  $\pm$  SD of triplicates, and are representative of two independent experiments. \* $P$ <0.05, \*\* $P$ <0.01 by Student's t-test.

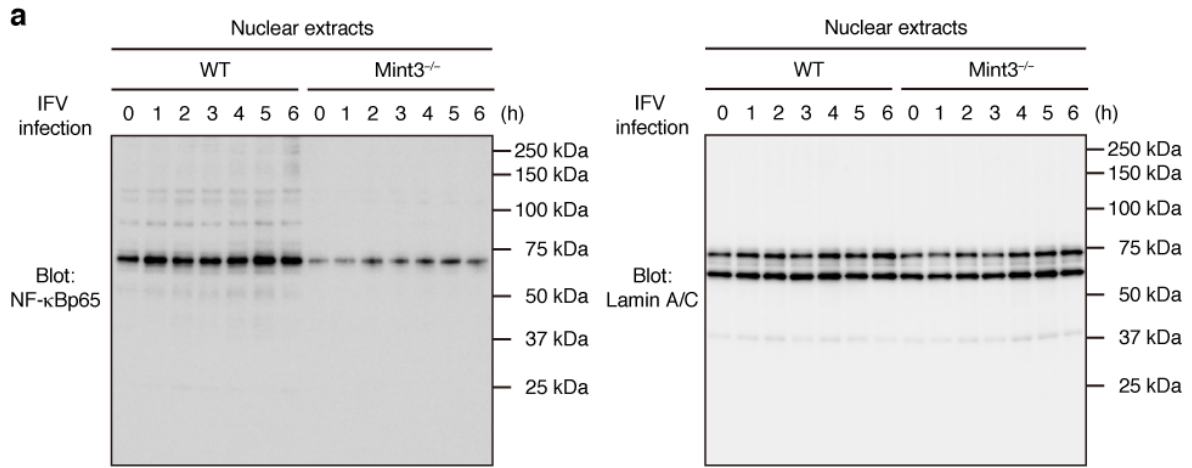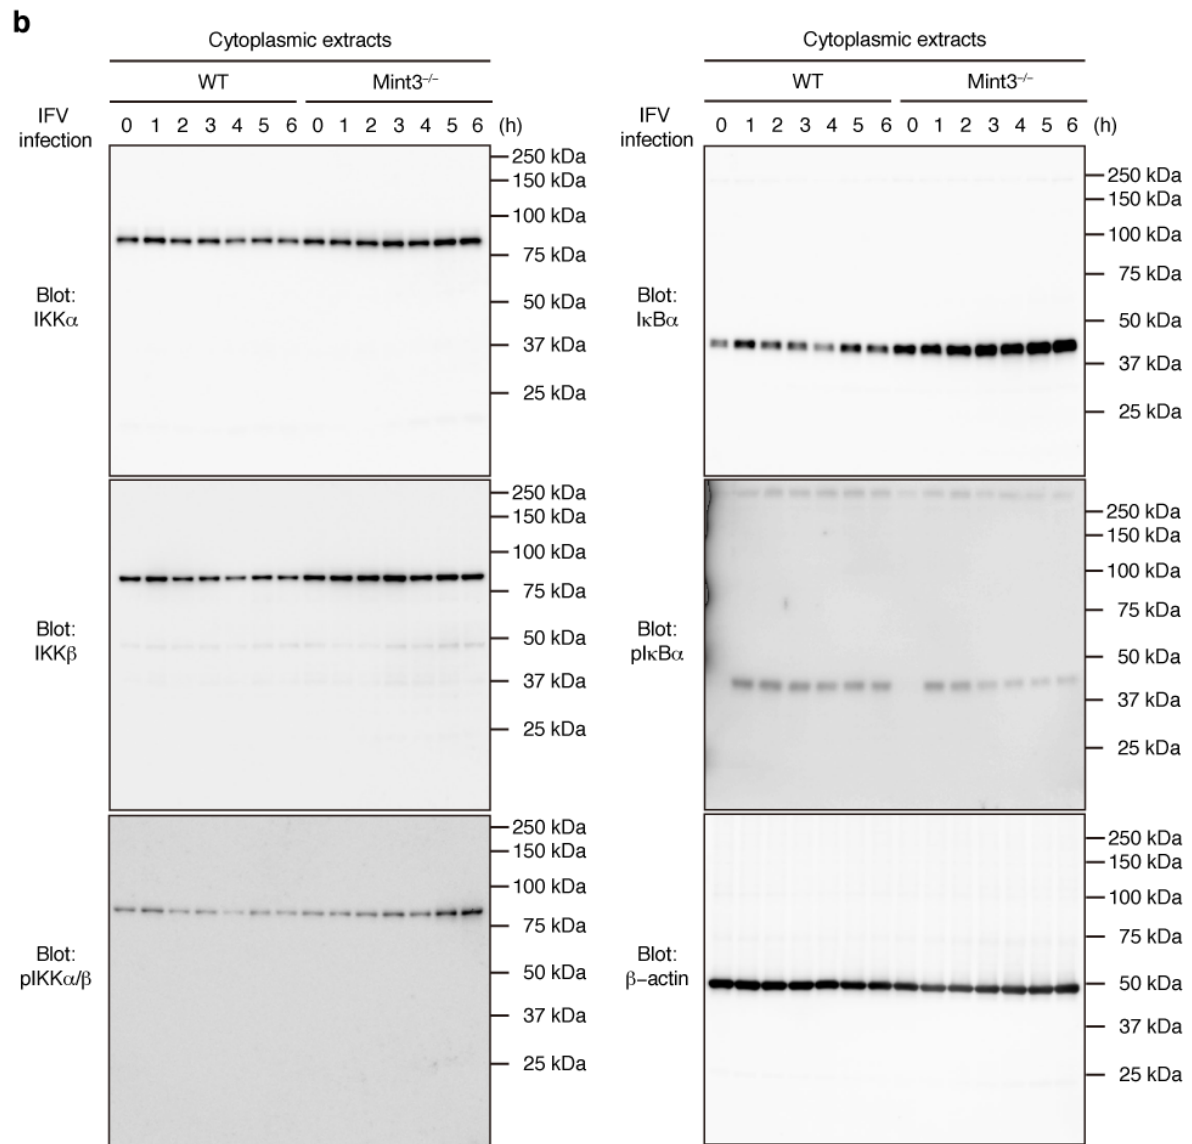

**C**

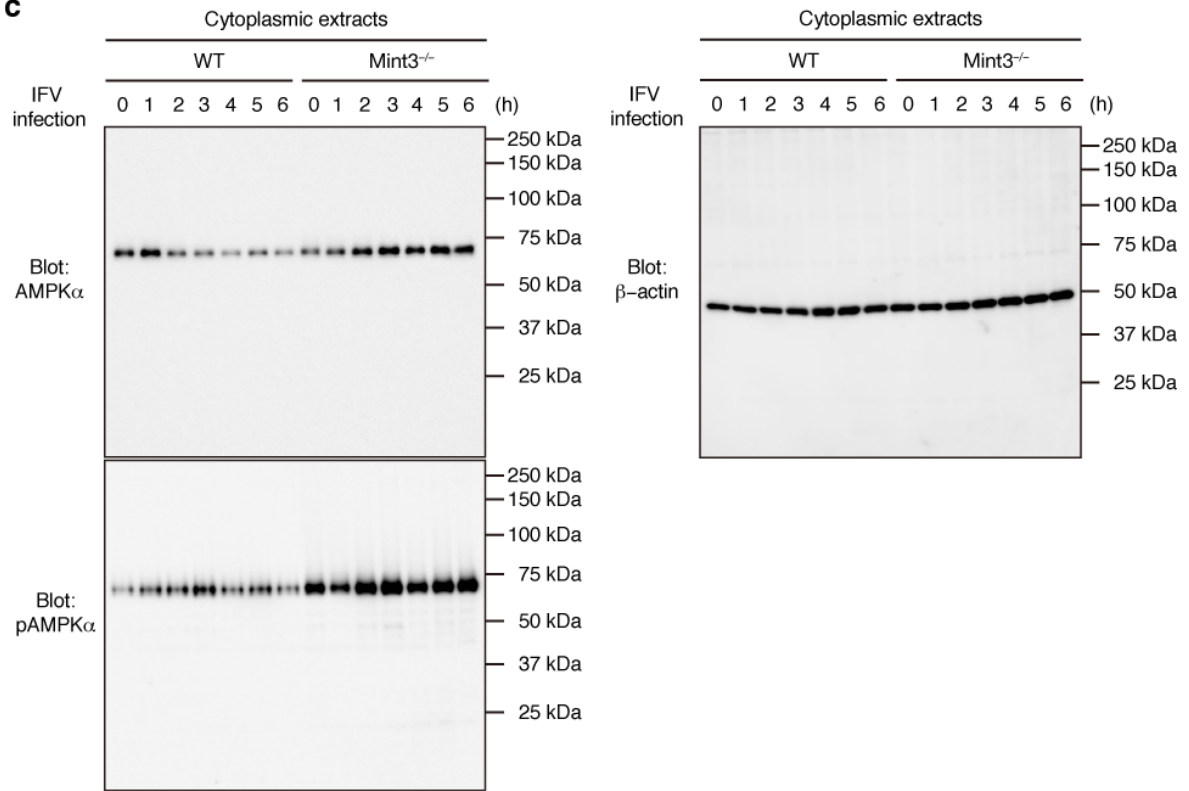

**d**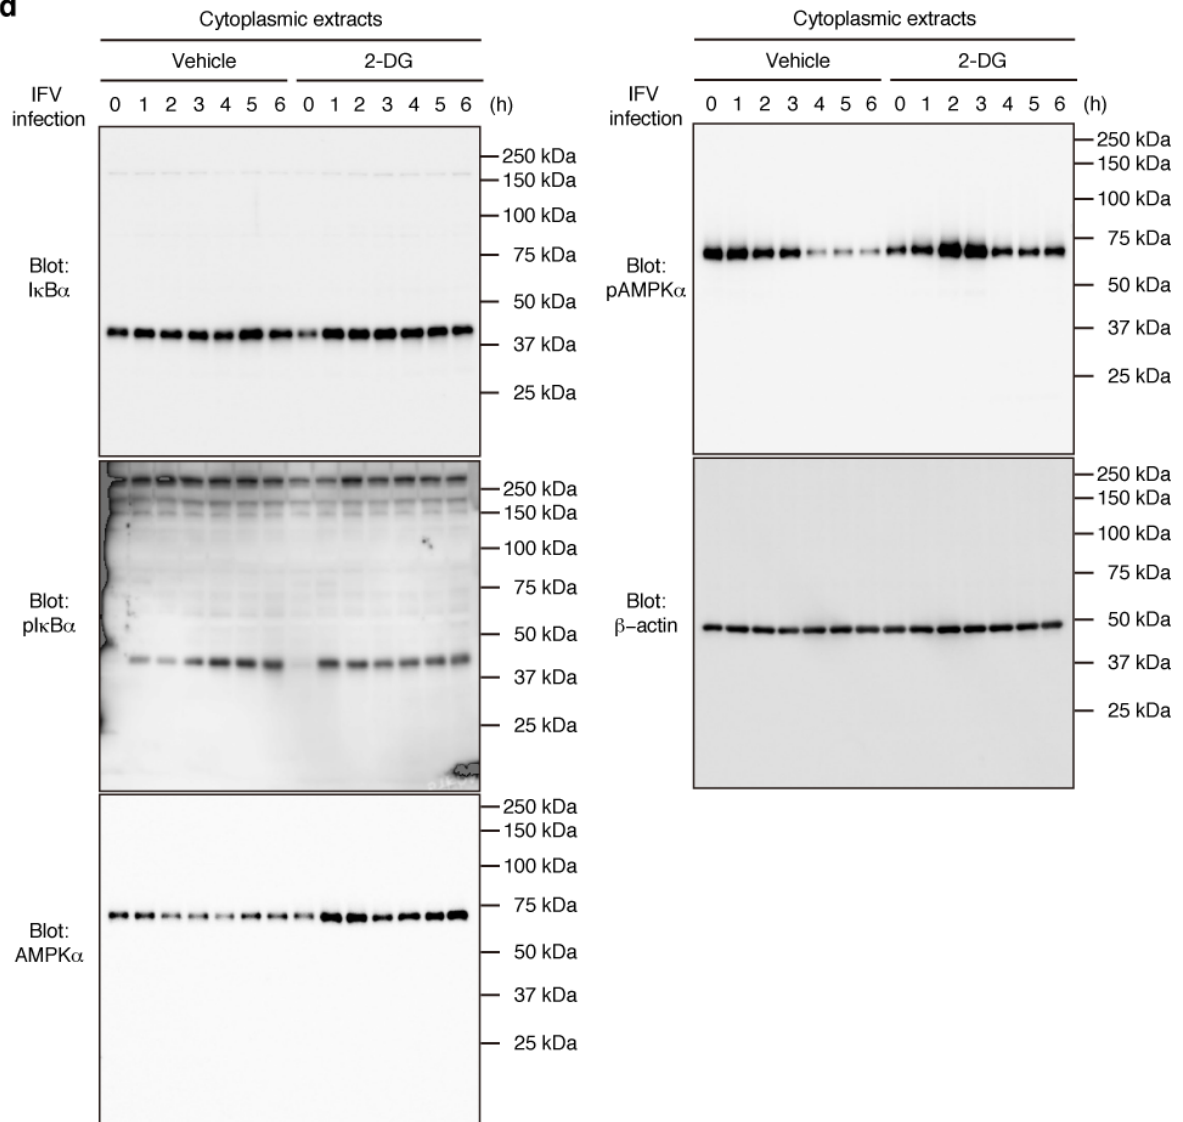**e**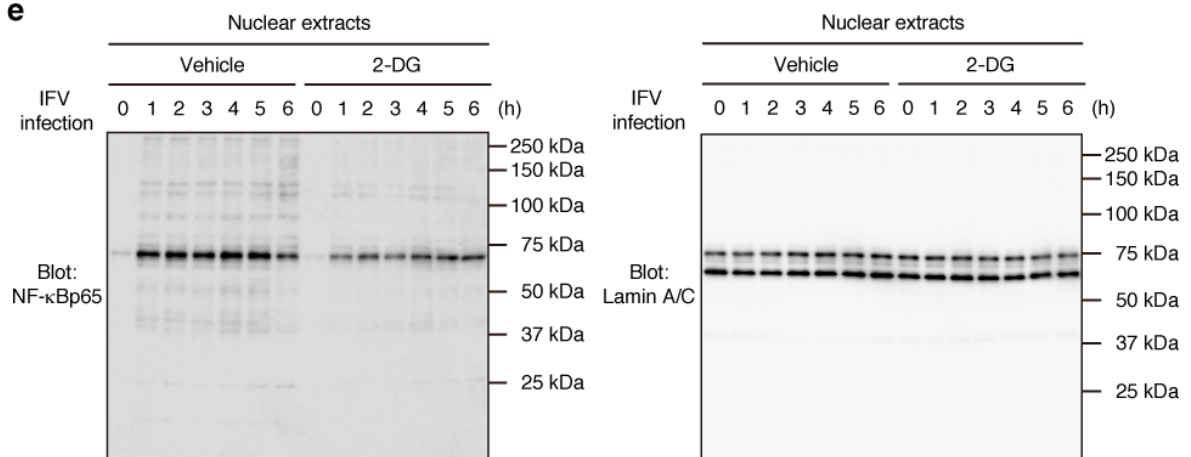



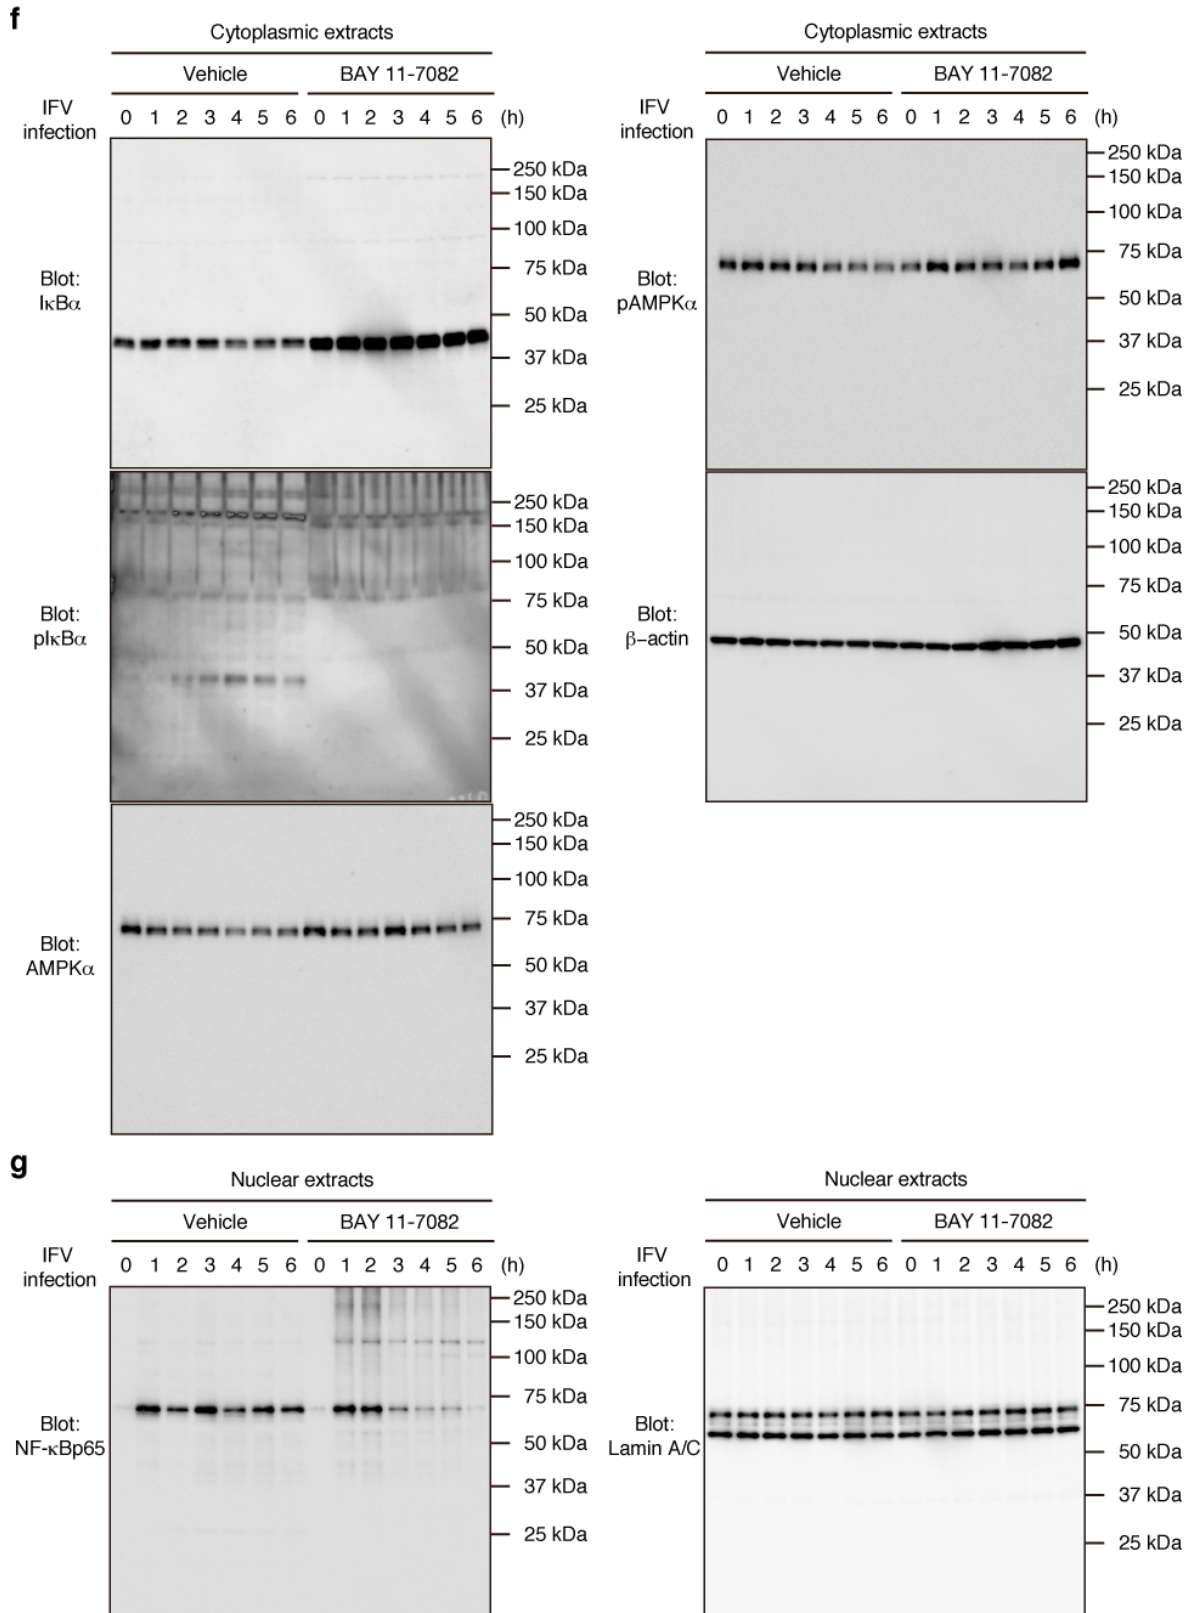

**Supplementary Figure S3**

**Full scans of Immunoblots in the main figures.**

(a) Full blots of *Figure 4b*. (b) Full blots of *Figure 4c*. (c) Full blots of *Figure 5b*. (d) Full blots of *Figure 5d*. (e) Full blots of *Figure 5e*. (f) Full blots of *Figure 5f*. (g) Full blots of *Figure 5g*.
